# Supplementary material for: Development and Assessment of Herpes Simplex Virus Type 1 (HSV-1) Amplicon Vectors with Sensory Neuron-Selective Promoters
Source: MDPI journal article supplement (doi:10.3390/ijms23158474), 2022-07-30
Supplement: s1 [file s1]

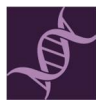

Supplementary Materials

TRPV1

actagtatatggagaggtgggggtgaggggtggcagagaggggatcgagagagagagaggggaaccagatgtagcagccaggaggccaaagggtacaaaaggggtgggtaacccaaatgt  
ctggattataaaaaagagccagaggtcagggccactttgatatgttaaataggcacctcagccattatccagggttgaaatgtaataataattacatccccctggcttctagagaccgttgttag  
acggatgacctctgcagaatgtttaggggtgagtccttgcatgtactccctgggtgggtcttctgggagagatcgggaggaatgggtctgttctagtcacccactcgctatgatgaggaaccc  
gttcttagtagttaggagtcggtgggggagggcgagaatagcacacgtaacgttttctgtgttcttcttactaagggaacccagtcaggcaagactgggcttggaagacccagagacc  
accaaactaatcttaccgggtctgagtagcacagggtcagagtcacaaagggggcagggcctccagacaggtggctcagaggtccagtccttggaaacatggcatctcaggacact  
gggtcttgcacatctggtctgtgacagtccttgaaggagctactcctcagacatacaggagagatgggttggaaagtcagatccaaagcctgggtcaggctggagcgtggctgacagcgtgta  
gtgtcctctgcctggcatggctgggggtggggcattggctgtgggttctgaaaaagggtcaaaatgatgggaaaagccttgggatcctctgggaatcgagccgtggtaacagcagctgct  
ggcattgtcgaaaatgttctttagtgccagagatgcccagagccatccctgcccgtacgagggggagggcgaggacccacagagggcaggggagggcgccactcttaccacacagca  
gctggctctcccaaaagaacagctatgcat

rCGRP

actagtctcaggaggggacttgaggcaggcttgggacaattgagaatgaacccctaaggatgcttctgtgggccacagagactgtgagtggtgtgttcttggatagcgttaccatttggga  
aagagaggagagtgctgtgtccaggagaagtgtgactggttagtgatgtgaggttagtagcggggcaacatctccacagcgctgaagcctgctgctgtctttagctcggaga  
tctaagggtgggggtaggagggggagccaccggaccaatacaactgggacatcttggcaaacagcagcgggaagcaaggggcagctgtgcaaatccttaggcaggcggggcgggcggg  
caggcggggcgggcgggcgggcaggcggggcaggcggggcgggcgggcgggcgggcgggcgggcgggcgggcgggcgggcgggcgggcgggcgggcgggcgggcgggcgggcggg  
gtccttctcacactgtccccactaccctgtaccctactcctaccctaacgagaccagctgaatacaaccccttctcacatgtgagtgagtgagttatccagcacataagaatgcaagctg  
aagacggatgattcactttgggaagagagatttatagtcaggaacacaaaggttctgctactagccaggccctcaaaaggggaccagataccactgaaaagttaatatgttgag  
cttctgtcaggccttgggggttgggggggggggaatttgaatttttttctgttcttcttctgtgtgtacataaccagcagggcagctacaaggttcagggtctgacagagccctgtgt  
ccagcaccaacacttggctatcagcctaaactgtgccaccctgcaaaagccagccttgagaccaagagtcacccctacgggtgactaaagtctccggataggcacggactagggtcgg  
ggcagcattagaatcagacatgcagcaaggagtagttagatactggacttactctcaaggtccagagattggagtcggggatgttcaagtcaggaggggaagagataaaattacctt  
gacgtcaaaaggcctccaaatcccgtcaattttaaagggtggttctactgtctcccatcctccacttccatcaatgacctcaatttaaattcaaatggtgtcatctgttagatgtcggagttc  
tggaagcaccgaggtgacgcaatctgtctggggcaggggccccttccactattggctgctggcgccccgggagccctcccaactaccgcggggaataagagcagctgcaggcgcttgg  
aatgcat

hCGRP

actagtgtacaaattaagggtcattagaagttaggcgttcccgtgctcctttagcagcaggagccaccaacccctagggggaagagatgtagcgcaggcagggggtgtctgtctaagaaa  
tttcgacgttctggggactgaggacaaaggtgaggacacgaccccggggtacctggagttcgtgactcgcgccagggacggcacacccataggggctaatttctgctgtcctcaaaagacctc  
aagctagagtccttgcctccgcccacagccccgggatgcccgtgctgctcaccgcacaggcagcgccggacggctgcagcagatcgcgcgtgcgcgttccaccgggagatggtggag  
acgtgaaaagcttcttctgaccttgcagcgtgtggcggaagcgcttagtccctacctctgtgagctgaacgctcaggcagagtggaactgaacccggttctgcccggatgtgagag  
ctgttagggtcagcgtaattgggtgtgagtgaggggcgctgttctgtatgtgtgcaggtttgatgcaagcaggtatcgtctgtcgcagtggtgttgatgcgaccccgagagactcggaggc  
aggcttgggacagctttagtgtaaacctcaggatacttctggccagatctgtttttagtgtctgtgaattcagagtgggcacatgttgggagacagtaattgggttgggtgtgttaaatgagt  
gtgacgggaagcgagtgtagcttgatctaggcaggggacacacagcactgtcacactgctgctttagtagaggactgaagtgcgggggtgggggtacggggcggggaataagaatgtct  
ctgggacatcttggcaaacagcagcgggaagcaaaaggggcgagctgtgcaaacggctcaggcaggtgatggatggcagggtaggaagggggaggttcagaggtctggatggaggtctccg  
catctgtaccttgaactacccctcaggcccagcagggtacggccccctctcacatgtaatgtatgagatgaagagttacccgggacagtcgggggagatggagatfcggaagatccatgg  
agatcttacagaatccctatgcggaccaggaaactctttagatccctgcctatctgaggccagcgctgggtgttctcacaatttcttcaagatgagattgtgttcccatftcaagatga  
gtacactgagcctctgtgaagttagtgcctatgacacacacagggaattgggccaactgtaatgaaactcgtcttaacaaagtcttgcctccagctcgtctgttctccacgagccctggcc  
ctctgtgggttaataccagctactggagtcagatttctgggccagaacccacttaggggcattaacctttaaactcacttgggcagggggtctgggatcagagttggaagagtcctacaatc  
ctggacccttccgcaaatcgtgaaaccagggtggagtgggggcgagggttcaaaaccaggcggactgagaggtgaaattcaccatgacgtcaaaactccctcaaatcccgtcactttaa  
ggcgcttactgttgggtccccaccatccccacatttccatcaatgacctcaatgcaatacaagtgggacggtctgtggtatcctcagggtctggaagcatgagggtgacgcaaccagg  
ggcaaaaggaccctccgcccattggtgtgtgactggcggaacttcccgaccacagcgcggggaataagagcagtcgtggcgctgggagggcctgcag

ASIC3

actagtctagccttctgtgagagctgtcccaaagggtggaagcactgttaatacaagttgatctgagtaaccataaggatcgtggaagtgtgtgggatggtgctcacttgaacagggaagca  
ggcagcctgtagtcctaaagctgggtgtccgttggcttctcaggtgttgagaaaagtacttgaagatcctgtagactacactgatgtccagaggtcagcccttctactctgtcagattc  
cttgatccagctcacttaaacccagaggtggtggccctagccttggtagagtgactctccactgagaatccatccctggccagccacatccaggttataggactgcagatcagggtgactg  
gatcggggggaggggtataactgcatgaccagacaagcattttagtcttctggtgcaaggtgacattgtctttaggagtgattggtgcagaggaccaacagctgtgttggggggcag  
tgtatcaccacatacactgctgtgaggacgaggaaaccaagaacccctagtcctgtgtgcccgggttcagtgctcgttagtgacagcctgggaagcagagctctgggggtgacttccactgctggct  
actgcgccatccccctccctaacaagggtagcttagagcaaggctttagtgcatgtccctgtgttagccctaccttctccttaccgagatccagaccattggtccacgtacacagattct  
gtccctgacagccacaggtgactgcccacagggaaggaccctatggctagtgccggagaccccaaccagtagctatgtaccctgtctgtacctggcctggcttccagccctcagag  
aacagcgacttgatgactctttaaattcttttttaagatttatttattttgtatagtagtacatgtagctgttctgtacacaccagaaagggcatcgattcattacagatggttgtgagcca  
catgtgtgtgtggtgattgaactcaggaccttgggaagagcagtcgggtgctttaaaccgtgagccatctctcagcccagacttgatgactctgtctttaaagctcccaagattaaatgaca  
catgttggaaattacgccccttaaaacacagtaaaatagccccctttagggcttcttagtggtcggtcacatcagtgccacaaaccccttcagttacctatccttctaagatgttactgtcctagtctgt  
gccactaagcctgggacattctgagactaagccccagtgctttagaggagggcgagtgccatccagtcagagccagcacagtggaactgattggttgggtgggattatgtccccaccactcatg  
gccagaagccaccaggaacactggcggtctccagtgctttagatggggcagtgatattttagtctcaaaagtggaagacctgccacaaacctaaaggagccactcagtcgcccaaga  
cttggtagtagcaacctcaaaagttaacctcgagctccagctgtgtgtgacacataccaggtaaatgaataaaaaataaaactagaaaaatttatgcgaatttctgtgattacttctgagcgtac  
aagatttggccaaattcctagatatacgaaggtatagactgtagccataccgaacatgacagtgacagaaccaggccttgcagtccttgggcagatgtccttgagtgactggccccctctgt

ctgagtccttgtactccttctccaagccagctagcaccaagcttatgggtgactcctcctgactggaagcacacaggtcccatccccaagctctcctcatcttcttcatctgcatctctagaa  
 gtagcttcaggacctgatcacatgctgcctttgctcaaggaggcagagtgacggcgtggagacccctgcaggcacattccctgggtcaagactactaggaaatgcaaatggcattcctgctatc  
 aggggtgggagtgggggatctgatgacatgatcagatgagtaaggcagtgccctcagccagaaactctgtttcaggcagtttccctatgacatcaatagcaaaagctggaaagtccagtggttat  
 cggagaagacataagacagcacctccagtaaatgaggggtgcttttcgggttctgaagttcatgggtccctagaatatgtttgttgagagaggaaaatgtaaagcagcggagtagacctgaatacctct  
 gggcattgtgaaggaggacagcttcgctaacaggaggcctgagaatgaggtgggggtctgggtctccaggcagagacggatactcagaagacagaaagccacgggatacggaaactaaa  
 gagagccccggtcacgtagtattgctaggatgctaggggcataagaagatctgctgtgccaaacctcccaccactcttaacttggtcaaaagccaagtccactctgcaaaagaacaagcgatc  
 tcaggtagggtcacagaagggcaggagaggcaaaaggagagaggggatagactaagaatcagccgctgacccaggtctagaattcaggagctctgaccaggagcctaaaaggcccaa  
 aggcacccaaacccaaatgtatatctgggtttccttcaagccctaccatggactgctgtgggttctcctggcgctctagctctgacaacagtgaactcccccatgctgcattaatggctcagcctg  
 gggccccagggaccttccctacccccagactgctctgctgccccccagccccctcatgcat

#### EF1 $\alpha$

actagtgtgaggctccggtgccgtcagtgggcagagcgcacatcgccacagtccccgagaagttggggggagggggtcggaattgaaccggtgcctagagaagggtgctgagggttaa  
 ctgggaaagtgtatgctgtactgctcgccttttcccgagggtgggggagaaccgtatataagtgtagtagtcgctgaacgttcttttcgcaacgggtttgcccgcagaacacaggtaag  
 tccgtgtgtgtgttcccgcgggcctggcctctttacgggttatggccttgctgcttgaattactccacctggctccagtacgtatcttctgatcccagctggagccaggggcgggccttgcgc  
 tttaggagcccccttgcctcgtgcttgagttgaggcctggcctgggcgctggggcgccgctgctgaatctgggtgcaccttgcgcctgtctgctgcttctgataagtctctagccattaaaaattt  
 ttgatgacctgctgcgacgttttttctggcaagatagcttctgtaaatcggggacaggtatctgcacactgggtatttctgggttttggggcgccggcgggcgacggggcccgtgctccagcgcac  
 atgttcggcgaggcggggcctgcgagcgccggccaccgagaatcgacgggggtagtctcaagctggccggcctgctctgggtcctggcctgcgcgcgcgtgtatcggccctggggcg  
 caaggctggcccggtcgccaccagtgtcgtgagcggaaagatggccgttccggccctgctccagggggctcaaatggaggacggcgctcgggagagcggcggggtgagtaccca  
 cacaaaggaaaggggccttccgtcctcagccgtcgtctcatgtgactccacggagtaccggggcgccgtccaggcacctcgattagtctggagcttttgagtagctgtctttagggtggggg  
 aggggttttatgcgatggagtttccacactgagtggtgggtagactgaagttaggccagcttgacactgatgaattctccttgaatttgcctttttgagtttgatcttggttcatttcaagcct  
 cagacagtgggtcaagtttttctccatttcaggtgtcgtgaactgcag
